# Supplementary material for: Genetic Diversity of Puumala orthohantavirus in Rodents and Human Patients in Austria, 2012–2019
Source: MDPI journal article supplement (doi:10.3390/v13040640), 2021-04-08
Supplement: s1 [file s1]

**Supplemental Table 1.** List of primers used for amplification of *Puumala orthohantavirus* sequences from human patients and rodents in Austria. Positions are in relation to the NCBI Reference sequence (GenBank Accession numbers for S segment, NC\_005224.1, and M segment, NC\_005223.1). Modifications to published primers are given asterisks.

| <b>Primer</b> | <b>Sequence</b>          | <b>Segment</b> | <b>Positions</b> | <b>Citation</b>      |
|---------------|--------------------------|----------------|------------------|----------------------|
| PuuALAD_F     | ACCAYCTCAAGGAGCGATCA     | S              | 305-324          | In house             |
| PuuALAD_R     | ACCWAGTTCAGCCATCCCTG     | S              | 1022-1041        | In house             |
| PuuRBBF_F     | ACCAYCTYAAGGARCGATCA     | S              | 305-324          | In house             |
| PuuRBBF_F     | ACCWAACTCTGCCATTCTG      | S              | 1022-1041        | In house             |
| PPT334C       | TATGGIAATGTCCTTGATGT     | S              | 334-353          | Bowen et al. 1997    |
| PPT334C*      | TATGGAAATGTCCTTGATGT     | S              | 334-353          | In house             |
| PPT986R       | GCACATGCAAATACCCA        | S              | 970-986          | Bowen et al. 1997    |
| PPT986R*      | GCACATGCRAATACCCA        | S              | 970-986          | In house             |
| PUUV_A1       | AATCCATCTGAGGCTACACCGTCT | M              | 1793-1816        | Plyusnin et al. 1997 |
| PUUV_A1*      | AATCCTGCTGAAGCHACAACATC  | M              | 1793-1815        | In house             |
| PUUV_C2       | CCAACTCCTGAACCCCATGC     | M              | 3003-3021        | Plyusnin et al. 1997 |
| PUUV_B1       | AACCCGGCAAATGAACAAGAA    | M              | 2147-2167        | Plyusnin et al. 1997 |
| PUUV_B2*      | TTGTTCAAGTGGACCTARAAAT   | M              | 2611-2632        | In house             |

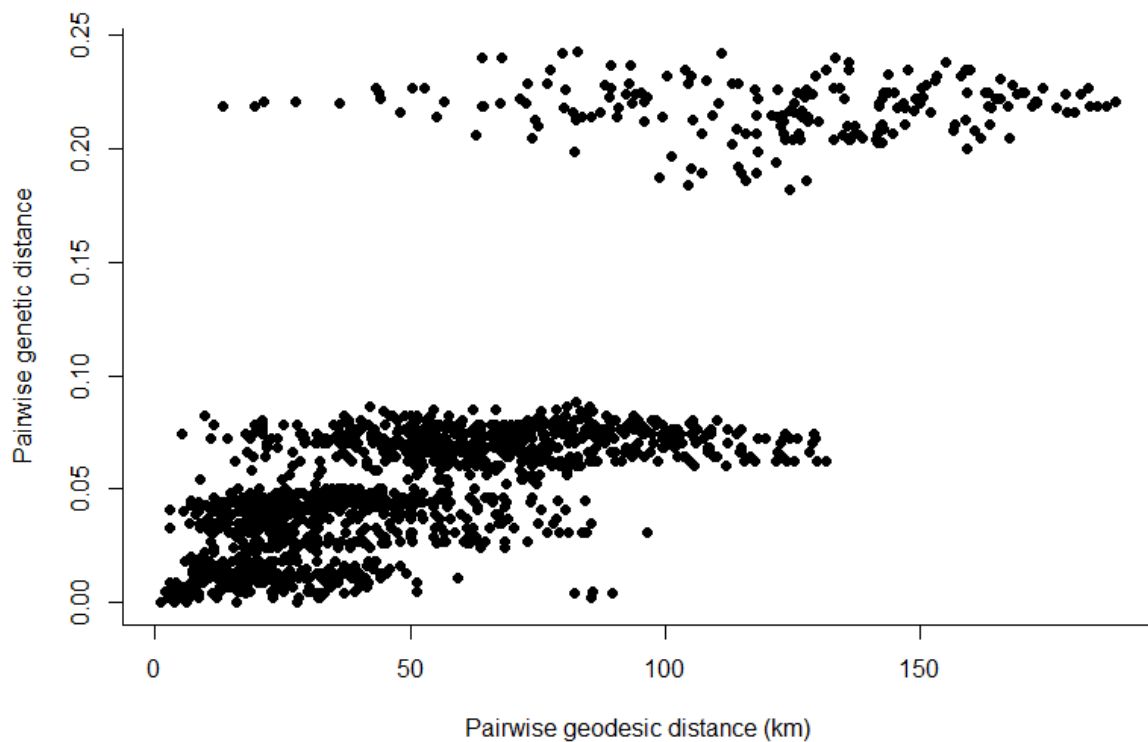

**Supplemental Figure S1.** Pairwise genetic distance between partial *Puumala orthohantavirus* (PUUV) S segment sequences obtained from Austrian patients and bank voles plotted against pairwise geodesic distance. Genetic distances are measured by calculating the cophenetic distance based on a Bayesian maximum clade credibility phylogram (based on a GTR+G+I substitution model) of a large selection of PUUV sequences available in GenBank (Supplemental Data 2). This figure shows a subset of only the georeferenced samples included in our study (Supplemental Data 1), from Austria 2012-2019.

**Supplemental Data 1.** List of *Puumala orthohantavirus* sequences retrieved from patients and rodents in Austria deposited in GenBank. Accession number is followed by location (“Austria”\_Federal State), isolate number (“Hu” = human serum-origin, “Mg” = *Clethrionomys glareolus* lung), and year of collection separated by forward slashes. The viral genomic segment is indicated at the end.

MW023666 Austria\_Carinthia/Hu1095139/2018 M segment  
MW023667 Austria\_Carinthia/Hu1105858/2018 M segment  
MW023668 Austria\_Styria/Hu1141379/2019 M segment  
MW023669 Austria\_Styria/Hu1145193/2019 M segment  
MW023670 Austria\_Styria/Hu1153799/2019 M segment  
MW023671 Austria\_Styria/Hu1155512/2019 M segment  
MW023672 Austria\_Styria/Hu1161395/2019 M segment  
MW023673 Austria\_Styria/Hu1197818/2019 M segment  
MW023674 Austria\_Carinthia/Hu1197858/2019 M segment  
MW023675 Austria\_Styria/Mg14\_Mitterfladnitz/2012 M segment  
MW023676 Austria\_Styria/Mg16\_Mitterfladnitz/2012 M segment  
MW023677 Austria\_Styria/Mg18\_Gamsgraben/2012 M segment  
MW023678 Austria\_Styria/Mg9\_Peggau/2012 M segment  
MW023679 Austria\_Styria/Hu1025550/2017 S segment  
MW023680 Austria\_Styria/Hu1026374/2017 S segment  
MW023681 Austria\_Styria/Hu1028716/2017 S segment  
MW023682 Austria\_Carinthia/Hu1029394/2017 S segment  
MW023683 Austria\_Carinthia/Hu1095139/2018 S segment  
MW023684 Austria\_Carinthia/Hu1105858/2018 S segment  
MW023685 Austria\_Styria/Hu1116851/2019 S segment  
MW023686 Austria\_Styria/Hu1120604/2019 S segment  
MW023687 Austria\_Styria/Hu1124640/2019 S segment  
MW023688 Austria\_Styria/Hu1128698/2019 S segment  
MW023689 Austria\_Styria/Hu1130869/2019 S segment  
MW023690 Austria\_Styria/Hu1135128/2019 S segment  
MW023691 Austria\_Styria/Hu1136110/2019 S segment  
MW023692 Austria\_Styria/Hu1137421/2019 S segment  
MW023693 Austria\_Styria/Hu1138226/2019 S segment  
MW023694 Austria\_Styria/Hu1139352/2019 S segment  
MW023695 Austria\_Styria/Hu1140233/2019 S segment  
MW023696 Austria\_Styria/Hu1141379/2019 S segment  
MW023697 Austria\_Styria/Hu1141709/2019 S segment  
MW023698 Austria\_Styria/Hu1143892/2019 S segment  
MW023699 Austria\_Styria/Hu1145193/2019 S segment  
MW023700 Austria\_Styria/Hu1147347/2019 S segment  
MW023701 Austria\_Styria/Hu1147348/2019 S segment  
MW023702 Austria\_Upper Austria/Hu1154432/2019 S segment  
MW023703 Austria\_Styria/Hu1155512/2019 S segment  
MW023704 Austria\_Styria/Hu1161372/2019 S segment  
MW023705 Austria\_Styria/Hu1161395/2019 S segment  
MW023706 Austria\_Styria/Hu1166857/2019 S segment  
MW023707 Austria\_Upper Austria/Hu1171197/2019 S segment  
MW023708 Austria\_Styria/Hu1176890/2019 S segment  
MW023709 Austria\_Styria/Hu1177866/2019 S segment  
MW023710 Austria\_Styria/Hu1177869/2019 S segment  
MW023711 Austria\_Styria/Hu1178867/2019 S segment  
MW023712 Austria\_Styria/Hu1180564/2019 S segment

MW023713 Austria\_Styria/Hu1182969/2019 S segment  
 MW023714 Austria\_Styria/Hu1185874/2019 S segment  
 MW023715 Austria\_Styria/Hu1191554/2019 S segment  
 MW023716 Austria\_Styria/Hu1193871/2019 S segment  
 MW023717 Austria\_Styria/Hu1197818/2019 S segment  
 MW023718 Austria\_Carinthia/Hu1197858/2019 S segment  
 MW023719 Austria\_Styria/Hu1198609/2019 S segment  
 MW023720 Austria\_Carinthia/Hu1206487/2019 S segment  
 MW023721 Austria\_Styria/Hu1209813/2019 S segment  
 MW023722 Austria\_Styria/Hu920792/2016 S segment  
 MW023723 Austria\_Styria/Hu938383/2016 S segment  
 MW023724 Austria\_Styria/Hu946014/2016 S segment  
 MW023725 Austria\_Styria/Hu986729/2017 S segment  
 MW023726 Austria\_Styria/Hu995423/2017 S segment  
 MW023727 Austria\_Styria/HuML33\_Mi/2012 S segment  
 MW023728 Austria\_Styria/Hu1146291/2019 S segment  
 MW023729 Austria\_Styria/Hu1124641/2019 S segment  
 MW023730 Austria\_Carinthia/Hu1154531/2019 S segment  
 MW023731 Austria\_Styria/Hu1153799/2019 S segment  
 MW023732 Austria\_Styria/Hu1176203/2019 S segment  
 MW023733 Austria\_Styria/Hu1176206/2019 S segment  
 MW023734 Austria\_Styria/Hu1176856/2019 S segment  
 MW023735 Austria\_Styria/Hu1177196/2019 S segment  
 MW023736 Austria\_Styria/Hu1195950/2019 S segment  
 MW023737 Austria\_Styria/Mg14\_Mitterfladnitz/2012 S segment  
 MW023738 Austria\_Styria/Mg16\_Mitterfladnitz/2012 S segment  
 MW023739 Austria\_Styria/Mg18\_Gamsgraben/2012 S segment  
 MW023740 Austria\_Styria/Mg9\_Peggau/2012 S segment

**Supplemental Data 2.** List of reference *Puumala orthohantavirus* S segment sequences used in phylogenetic analysis. All sequences were reported from the reservoir host, *Clethrionomys glareolus*, accessed from GenBank sequence database. Accession numbers are followed by Country and locale, isolate, and year (when available) separated by forward slashes.

AB297665 Russia Bashkiria/DTkUfa-97/1997  
 AF367066 Russia Omsk/CG215/2000  
 AJ223368 Norway Eidsvoll/1124v/1987  
 AJ223369 Norway Eidsvoll/Cg1138/1987  
 AJ223371 Norway Huggberget/Cg36/1994  
 AJ223374 Norway Mellansel/Cg47/1994  
 AJ223375 Norway Mellansel/Cg49/1994  
 AJ223377 Norway Solleftea/6Cg/1994  
 AJ223380 Norway Tavelso/Cg81/1994  
 AJ238779 Germany Cg-Erfu/1999  
 AJ238788 Russia Karhumaki//1995  
 AJ238789 Russia Kolodozero//1995  
 AJ238790 Russia Gomselga//1995  
 AJ238791 Denmark Fyn//1990  
 AJ277030 Belgium Thuin/33Cg/1996  
 AJ277032 Belgium Momignies/47Cg/1996  
 AJ277034 Belgium Couvin/59Cg/1996  
 AJ277076 Belgium Montbliart/CG14445/

AJ314597 Finland Pallasjarvi/63Cg/1998  
AJ314600 Balkan /65Cg/2000  
AJ314601 Balkan /78Cg/2000  
AJ888751 Austria Klippitztoerl/Cg9/1995  
AJ888752 Austria Ernstbrunn/Cg641/1995  
AM695638 France Mignovillard/CgY02/2005  
AM746299 Sweden Bussjo/95-3/1995  
AM746310 Sweden Djaknebole/98-1998/1998  
AM746315 Sweden Gumboda/98-1/1998  
AM746316 Sweden Gumboda/98-2/1998  
AM746320 Sweden Norum/98-1/1998  
AM746324 Sweden Norum/98-5/1998  
AM746325 Sweden Norum/98-6/1998  
AM746330 Sweden Palbole/98-4/1998  
AY954722 Germany Bavaria/CG\_9/2004  
AY954723 Germany Bavaria/CG\_34/2004  
AY954724 Germany Bavaria/CB\_20/2004  
AY954725 Germany Bavaria/CG\_2/2004  
DQ016430 Germany Bavaria/CG\_33/2004  
DQ016431 Germany Bavaria/CG\_39/2004  
DQ016432 Germany Bavaria/CG\_41/2004  
DQ322669 Germany Cologne/Mu05\_241/2005  
EU266762 Germany Albstadt/M4/2007  
EU439969 Germany Bavaria/152/2005  
EU439971 Germany Bavaria/Mg157/2005  
FN377821 Hungary Mg9\_HungaryTR17//2000  
FN377822 Hungary Mg23\_HungaryTR17//2000  
GQ339473 Finland Kiviniemi/Mg3/2005  
GQ339476 Sweden Aijajarvi/Mg7/2005  
GQ339478 Sweden Jockfall/Mg12/2005  
GQ339479 Sweden Moskosel/Mg17/2005  
GQ339480 Sweden Gyttjea/Mg19/2005  
GQ339481 Sweden Ljustask/Mg20/2005  
GQ339482 Sweden Kalvudden/Mg22/2005  
HE801633 Finland Sotkamo//2009  
JN657228 Latvia Jelgava/Mg149/2008  
JN696357 Germany Sinntal/Mu442/2010  
JN696358 Germany Osnabrueck/Mu362/2005  
JN696361 Germany Heimerdingen/Mu1083/2010  
JN696362 Germany Billerbeck/Mu2034/2010  
JN696365 Germany Bramsche/Mu3072/2010  
JN696366 Germany Darmstadt/Mu427/2009  
JN696367 Germany Darmstadt/Mu428/2009  
JN696368 Germany Gilserberg/Mu557/2010  
JN696369 Germany Salmuenster/Mu563/2010  
JN696370 Germany Weissach/Mu978/2010  
JN696373 Germany Karlstadt/MuEb10/2010  
JN696374 Germany Lackenberg/MuEb12/2010  
JN696375 Germany Lackenberg/MuEb14/2010  
JN696376 Germany Elsenthal/MuEb51/2010  
JN831943 Finland Pieksamaki/Mg7/2008  
JQ319163 Finland Konnevesi/Mg\_M94A/2005

JQ319164 Finland Konnevesi/Mg\_O6B/2005  
JQ319168 Finland Konnevesi/Mg\_O22B/2005  
KC676609 Croatia Geroovo/Mg938/2008  
KC676610 Croatia Geroovo/Mg954/2008  
KC676611 Croatia Geroovo/Mg955/2008  
KC676612 Croatia Geroovo/Mg978/2008  
KC676613 Croatia Geroovo/Mg979/2008  
KC676614 Croatia Geroovo/Mg980/2008  
KC676615 Croatia Geroovo/Mg982/2008  
KF776864 Slovenia /HtSi1054/1995  
KF776872 Slovenia /HtSi1101/2007  
KF776873 Slovenia /HtSi1069/1999  
KF776879 Slovenia /HtSi1063/1999  
KF776881 Slovenia /HtSi1058/1995  
KF776884 Slovenia /HtSi1079/1995  
KF776885 Slovenia /HtSi1071/1999  
KJ994776 Germany Astrup/Mu\_07\_12/2007  
KR047244 Germany Ellerbeck/eller\_08\_025/2008  
KR047245 Germany Ellerbeck/eller\_10\_028/2010  
KR047257 Germany Schleddehausen/schle\_08\_053/2008  
KR047259 Germany Schleddehausen/schle\_08\_059/2008  
KR047313 Germany Bramsche/varus\_12\_032/2012  
KT247593 France Ardennes/Mg75/2011  
KT247594 France Orleans/Mg23/2010  
KT247595 France Orleans/Mg29/2010  
KT247596 France Jura/Mg2/2010  
KU314900 Netherlands A/Mg1012/2010  
KU314901 Netherlands A/Mg1439/2011  
KU314902 Netherlands B/Mg2/2008  
KU314905 Netherlands E/Mg591/2008  
KU670632 Germany Goettingen/KS11\_1342/  
KU670634 Germany Cologne/KS11\_2387/  
KU670635 Germany Osnabrueck/KS14\_715/  
KU670636 Germany Osnabrueck/KS14\_833/  
KU670637 Germany Osnabrueck/KS14\_873/  
KU670638 Germany Osnabrueck/KS14\_766/  
KU670639 Germany Osnabrueck/KS14\_778/  
KU670640 Germany Osnabrueck/KS10\_3078/  
KU670641 Germany Walbeck/Mu07\_116/  
KU670642 Germany Diedorf/KS10\_3482/  
KU670643 Germany Diedorf/KS10\_3485/  
KX757839 Lithuania /LT15\_164/2015  
KX757840 Lithuania /LT15\_174/2015  
KX757841 Lithuania /LT15\_201/2015  
KX815394 Poland /KS13\_855/2009  
KY365000 France Murbach-Alsace/2012\_2/2012  
MG812389 Belgium Gierle/MG3/2012  
MG812391 Belgium Chimay/MG1/2012  
MG812393 Belgium Rance/MG1/2012  
MG812395 Belgium Beaumont/MG1/20  
MG812434 Belgium Beaumont/MG9/20  
MG812435 Belgium Fontaine-Leveque/MG1/2007

MG812443 Belgium Zevendonk/MG3/2007  
MG812457 Belgium Viroinval/MG1/2007  
MG812466 Belgium Chimay/MG1/2010  
MK946422 France Orleans/NCHA376/2014  
MK946423 France Orleans/NCHA380/2014  
MK946425 France Septmoncel-Jura/Camp9/2015  
MK946427 France Poligny-Jura/NCHA181/2014  
MK946428 France Orleans/ORW12\_54/2012  
MK946429 France Vosges/LPP/2015  
MK946430 France Ardennes/CSSP15-5/2015  
MK946434 France Ardennes/Hargnies\_161/2011  
MN026263 Germany Winnigen/H104/2018  
MN026264 Germany Drensteinfurt/H13025/2018  
U14137 "Vranica"  
U22423 France CG/13891/1990  
U95306 Austria /K16/1995  
U95307 Austria /P1/1995  
U95308 Austria /K11/1995  
Z21497 Russia Udmurtia/894Cg/1991  
Z30704 Finland Evo/14Cg/1993  
Z30708 Russia Udmurtia/338Cg/1992  
Z48586 Sweden Vindeln/L20Cg/1983

**Supplemental Data 3.** List of reference *Puumala orthohantavirus* M segment sequences used in phylogenetic analysis. All sequences were reported from the reservoir host, *Clethrionomys glareolus*, accessed from GenBank sequence database. Accession numbers are followed by Country, isolate, and year (when available) separated by forward slashes.

AJ238778 Germany/Cg-Erft/  
AJ278091 Denmark Fyn/47/  
AJ877240 Croatia Okucani/387/  
AJ877241 Croatia Okucani/416/  
AJ877242 Croatia Okucani/421/  
AJ877243 Croatia Nova Gradiska/730/  
AJ877244 Croatia Nova Gradiska/Cg/  
AJ888753 Austria Ernstbrunn/Cg64/1995  
AJ888754 Austria Klippitztoerl/Cg641/1995  
AM695639 France Mignovillard/CgY/2005  
FN377823 Hungary HungaryTR17/Mg2/2000  
FN377824 Hungary HungaryTR17/Mg9/2000  
FN377825 Hungary HungaryTR17/Mg23/2000  
GQ339488 Sweden Kiviniemi/Mg3/2005  
GQ339489 Sweden Jockfall/Mg12/2005  
GQ339490 Sweden Moskosel/Mg17/2005  
GQ339491 Sweden Kalvudden/Mg22/2005  
GQ339492 Sweden Bergsjobo/Mg25/2005  
GQ339493 Sweden Faboviken/Mg26/2005  
GQ339494 Sweden Mangelbo/Mg1/2005  
GQ339495 Sweden Munga/Mg16/2005  
JN831944 Finland Pieksamaki/Mg7/2008  
JQ319172 Finland Konnevesi/MgO78A/2005  
JQ319247 Finland Konnevesi/MB9/2008-9  
KC676629 Croatia Geroovo/Mg938/2008  
KC676630 Croatia Geroovo/Mg954/2008  
KC676631 Croatia Geroovo/Mg955/2008  
KC676632 Croatia Geroovo/Mg978/2008  
KC676633 Croatia Geroovo/Mg979/2008  
KC676634 Croatia Geroovo/Mg980/2008  
KC676635 Croatia Geroovo/Mg982/2008  
KJ994777 Germany Osnabrueck/Mu07\_1219/20007  
KT247598 France Jura/Mg2/2010  
KT247599 France Jura/Mg214/2010  
KT247600 France Orleans/Mg23/2010  
KT247601 France Orleans/Mg29/2010  
KT247602 France Ardennes/Mg75/2011  
KT247603 France Ardennes/Mg156/2011  
KT885051 Russia /CG1820\_POR/2015  
KU314906 Netherlands /Mg31/2007  
KU314907 Netherlands /Mg25/2007  
KU314912 Netherlands /Mg2/2008  
KU314913 Netherlands /Mg66/2008  
L08754 Russia /K27/  
Z49214 Sweden Vindeln/L20Cg/1983  
Z70201 Finland Virrat/25Cg/1995
